# Supplementary material
Source: PubMed Central journal article supplement (PMC3750675)
Supplement: cn400077d_si_001.pdf [file cn400077d_si_001.pdf]

## Supporting Information

### Water-Soluble MMP-9 Inhibitor Prodrug Generates Active Metabolites that Cross the Blood-Brain Barrier

Wei Song,<sup>†</sup> Zhihong Peng,<sup>†</sup> Major Gooyit,<sup>†</sup> Mark A. Suckow,<sup>‡</sup> Valerie A. Schroeder,<sup>‡</sup> William R. Wolter,<sup>‡</sup> Mijoon Lee,<sup>†</sup> Masajiro Ikejiri,<sup>†</sup> Jiankun Cui,<sup>§</sup> Zezong Gu,<sup>§</sup> and Mayland Chang<sup>†\*</sup>

<sup>†</sup>Department of Chemistry and Biochemistry, University of Notre Dame, Notre Dame, Indiana 46556, USA

<sup>‡</sup>Freimann Life Sciences Center and Department of Biological Sciences, University of Notre Dame, Notre Dame, Indiana 46556, USA

<sup>§</sup>Department of Pathology, University of Missouri, School of Medicine, Columbia, Missouri 65212, USA

**Table S1. Concentrations of ND-478, ND-322 and ND-364 after a 30-min iv infusion of ND-478 to mice**

| Time (min)<br>after end of<br>infusion | ND-478<br>after dose of ND-478<br>Brain <sup>a</sup> | ND-478<br>after dose of ND-478<br>Plasma <sup>b</sup> | ND-322<br>after dose of ND-478<br>Brain <sup>a</sup> | ND-322<br>after dose of ND-478<br>Plasma <sup>b</sup> | ND-364<br>after dose of ND-478<br>Brain <sup>a</sup> | ND-364<br>after dose of ND-478<br>Plasma <sup>b</sup> |
|----------------------------------------|------------------------------------------------------|-------------------------------------------------------|------------------------------------------------------|-------------------------------------------------------|------------------------------------------------------|-------------------------------------------------------|
| -15                                    | NQ <sup>c</sup>                                      | 4.18 ± 0.840                                          | 0.0585 ± 0.0154                                      | 10.7 ± 0.860                                          | 2.26 ± 1.56                                          | 0.320 ± 0.0599                                        |
| 0                                      | NQ <sup>c</sup>                                      | 6.81 ± 3.95                                           | 0.301                                                | 14.5 ± 2.81                                           | 2.17                                                 | 0.365 ± 0.0688                                        |
| 10                                     | NQ <sup>c</sup>                                      | 0.508 ± 0.0870                                        | 0.0275 ± 0.0198                                      | 4.36 ± 0.613                                          | 0.972 ± 0.703                                        | 0.229 ± 0.110                                         |
| 20                                     | NQ <sup>c</sup>                                      | 0.274 ± 0.116                                         | NQ <sup>c</sup>                                      | 2.15 ± 0.602                                          | 0.480 ± 0.367                                        | 0.142 ± 0.0617                                        |
| 30                                     | NQ <sup>c</sup>                                      | 0.230 ± 0.167                                         | NQ <sup>c</sup>                                      | 0.650 ± 0.432                                         | 0.178 ± 0.00937                                      | 0.0599 ± 0.0280                                       |
| 45                                     | NQ <sup>c</sup>                                      | 0.0878 ± 0.0480                                       | NQ <sup>c</sup>                                      | 0.120 ± 0.0236                                        | 0.0368 ± 0.00601                                     | 0.0167 ± 0.00410                                      |
| 60                                     | NQ <sup>c</sup>                                      | 0.0573 ± 0.0263                                       | NQ <sup>c</sup>                                      | 0.0729 ± 0.0104                                       | NQ <sup>c</sup>                                      | 0.0111 ± 0.00325                                      |
| 120                                    | NQ <sup>c</sup>                                      | 0.0309 ± 0.0140                                       | NQ <sup>c</sup>                                      | 0.0502 ± 0.00471                                      | NQ <sup>c</sup>                                      | 0.00827 ± 0.000808                                    |

<sup>a</sup> Concentration in pmol/mg tissue

<sup>b</sup> Concentration in  $\mu$ M

<sup>c</sup> NQ = not quantifiable

**Table S2. Concentrations of ND-322 and ND-364 after a single sc dose to mice**

| Time (min) | ND-322                                         |                                                 |                                                |                                                 | ND-364                                         |                                                 |                                                |                                                 |
|------------|------------------------------------------------|-------------------------------------------------|------------------------------------------------|-------------------------------------------------|------------------------------------------------|-------------------------------------------------|------------------------------------------------|-------------------------------------------------|
|            | ND-322 after dose of ND-322 Brain <sup>a</sup> | ND-322 after dose of ND-322 Plasma <sup>b</sup> | ND-364 after dose of ND-322 Brain <sup>a</sup> | ND-364 after dose of ND-322 Plasma <sup>b</sup> | ND-364 after dose of ND-364 Brain <sup>a</sup> | ND-364 after dose of ND-364 Plasma <sup>b</sup> | ND-322 after dose of ND-364 Brain <sup>a</sup> | ND-322 after dose of ND-364 Plasma <sup>b</sup> |
| 10         | 0.685 ± 0.0363                                 | 7.29 ± 0.665                                    | 0.669 ± 0.0719                                 | 0.430 ± 0.0472                                  | 1.58 ± 0.406                                   | 6.60 ± 2.15                                     | NQ <sup>c</sup>                                | 0.215 ± 0.188                                   |
| 20         | 0.337 ± 0.0995                                 | 5.31 ± 1.51                                     | 0.468 ± 0.0550                                 | 0.322 ± 0.0920                                  | 1.36 ± 0.435                                   | 5.79 ± 1.93                                     | NQ <sup>c</sup>                                | 0.189 ± 0.0644                                  |
| 30         | 0.533 ± 0.0809                                 | 5.27 ± 1.20                                     | 0.553 ± 0.0235                                 | 0.319 ± 0.0377                                  | 1.39 ± 0.496                                   | 4.09 ± 1.44                                     | NQ <sup>c</sup>                                | 0.182 ± 0.0696                                  |
| 45         | 0.227 ± 0.0812                                 | 3.03 ± 0.0257                                   | 0.352 ± 0.0207                                 | 0.212 ± 0.0254                                  | 0.703 ± 0.357                                  | 3.46 ± 1.80                                     | NQ <sup>c</sup>                                | 0.156 ± 0.0774                                  |
| 60         | 0.254 ± 0.0298                                 | 1.95 ± 0.183                                    | 0.380 ± 0.0268                                 | 0.150 ± 0.0310                                  | 0.848 ± 0.542                                  | 1.61 ± 0.224                                    | NQ <sup>c</sup>                                | 0.133 ± 0.0328                                  |
| 90         | 0.163 ± 0.0222                                 | 1.34 ± 0.443                                    | 0.251 ± 0.0429                                 | 0.0952 ± 0.0433                                 | 0.437 ± 0.101                                  | 0.824 ± 0.267                                   | NQ <sup>c</sup>                                | 0.0667 ± 0.0327                                 |
| 120        | 0.156 ± 0.0295                                 | 0.812 ± 0.822                                   | 0.234 ± 0.100                                  | 0.0732 ± 0.0523                                 | 0.306 ± 0.180                                  | 0.343 ± 0.312                                   | NQ <sup>c</sup>                                | 0.0401 ± 0.0249                                 |
| 180        | 0.130 ± 0.0130                                 | 0.291 ± 0.211                                   | 0.169 ± 0.0365                                 | 0.0226 ± 0.00351                                | 0.263 ± 0.0802                                 | 0.186 ± 0.120                                   | NQ <sup>c</sup>                                | 0.0197 ± 0.00668                                |
| 240        | 0.117 ± 0.00244                                | 0.0530 ± 0.0362                                 | 0.129 ± 0.00881                                | 0.0146 ± 0.00283                                | 0.135 ± 0.0228                                 | 0.0699 ± 0.0638                                 | NQ <sup>c</sup>                                | NQ <sup>c</sup>                                 |

<sup>a</sup> Concentration in pmol/mg tissue

<sup>b</sup> Concentration in μM

<sup>c</sup> NQ = not quantifiable

**Table S3. Concentrations of ND-322 and ND-364 after a single ip dose of ND-364 to mice**

| Time (min) | ND-364 in Brain <sup>a</sup> | ND-364 in Plasma <sup>b</sup> | ND-322 in Brain <sup>a</sup> | ND-322 in Plasma <sup>b</sup> |
|------------|------------------------------|-------------------------------|------------------------------|-------------------------------|
| 5          | 6.01 ± 6.71                  | 10.6 ± 10.9                   | 0.0246 ± 0.0288              | 0.579 ± 0.560                 |
| 10         | 15.5 ± 4.31                  | 17.4 ± 6.89                   | 0.578 ± 0.125                | 1.74 ± 0.530                  |
| 20         | 2.16 ± 0.303                 | 2.63 ± 0.497                  | 0.0272 ± 0.00333             | 0.497 ± 0.0522                |
| 30         | 1.30 ± 0.958                 | 1.82 ± 1.07                   | NQ <sup>c</sup>              | 0.465 ± 0.435                 |
| 45         | 0.214 ± 0.0667               | 0.478 ± 0.0862                | NQ <sup>c</sup>              | 0.137 ± 0.0458                |
| 60         | 0.0766 ± 0.0503              | 0.340 ± 0.170                 | NQ <sup>c</sup>              | 0.0338 ± 0.0269               |
| 90         | 0.0509 ± 0.0374              | 0.393 ± 0.238                 | NQ <sup>c</sup>              | 0.0159 ± 0.00829              |
| 120        | 0.0879 ± 0.0196              | 0.296 ± 0.0505                | NQ <sup>c</sup>              | 0.0262 ± 0.0130               |
| 180        | 0.0430 ± 0.00187             | 0.210 ± 0.0165                | NQ <sup>c</sup>              | 0.0128 ± 0.00543              |
| 240        | 0.0205 ± 0.00550             | 0.141 ± 0.00611               | NQ <sup>c</sup>              | 0.0305 ± 0.0183               |

<sup>a</sup> Concentration in pmol/mg tissue

<sup>b</sup> Concentration in μM

<sup>c</sup> NQ = not quantifiable

**Table S4. Inter-day accuracy, precision, and relative error for ND-322 and ND-364 in spiked mouse plasma samples**

| Day of Analysis | Low QC (0.1 $\mu$ M) |        | Medium QC (8 $\mu$ M) |        | High QC (50 $\mu$ M) |        |
|-----------------|----------------------|--------|-----------------------|--------|----------------------|--------|
|                 | ND-322               | ND-364 | ND-322                | ND-364 | ND-322               | ND-364 |
| 1               | 0.0992               | 0.140  | 6.72                  | 7.21   | 48.3                 | 58.9   |
|                 | 0.129                | 0.0948 | 6.77                  | 7.84   | 52.4                 | 39.6   |
|                 | 0.120                | 0.0920 | 7.75                  | 7.55   | 46.7                 | 59.4   |
| 2               | 0.108                | 0.129  | 7.84                  | 9.89   | 50.8                 | 52.7   |
|                 | 0.104                | 0.120  | 9.63                  | 7.82   | 46.5                 | 55.8   |
|                 | 0.136                | 0.111  | 7.91                  | 8.78   | 51.2                 | 54.0   |
| 3               | 0.126                | 0.0992 | 6.75                  | 7.23   | 50.5                 | 45.6   |
|                 | 0.107                | 0.108  | 7.92                  | 5.92   | 53.0                 | 51.3   |
|                 | 0.0727               | 0.0784 | 6.62                  | 7.74   | 55.7                 | 45.3   |
| Mean            | 0.111                | 0.108  | 7.55                  | 7.78   | 50.6                 | 51.4   |
| s.d.            | 0.0191               | 0.0193 | 0.971                 | 1.09   | 3.00                 | 6.67   |
| Precision, CV%  | 17.2                 | 17.8   | 12.9                  | 14.1   | 5.93                 | 13.0   |
| Accuracy%       | 111                  | 108    | 94.3                  | 97.2   | 101                  | 103    |
| Relative error% | 11.2                 | 8.03   | 5.67                  | 2.80   | 1.14                 | 2.82   |

**Table S5. Inter-day accuracy, precision, and relative error for ND-322 and ND-364 in spiked mouse brain samples**

| Day of Analysis | Low QC (0.1 pmol/mg tissue) |        | Medium QC (8 pmol/mg tissue) |        | High QC (50 pmol/mg tissue) |        |
|-----------------|-----------------------------|--------|------------------------------|--------|-----------------------------|--------|
|                 | ND-322                      | ND-364 | ND-322                       | ND-364 | ND-322                      | ND-364 |
| 1               | 0.135                       | 0.112  | 7.26                         | 7.99   | 50.5                        | 50.7   |
|                 | 0.143                       | 0.122  | 7.55                         | 8.54   | 50.6                        | 50.0   |
|                 | 0.104                       | 0.118  | 7.87                         | 8.41   | 50.4                        | 50.6   |
| 2               | 0.136                       | 0.125  | 7.50                         | 7.56   | 50.0                        | 50.0   |
|                 | 0.118                       | 0.112  | 7.16                         | 7.35   | 49.4                        | 50.6   |
|                 | 0.119                       | 0.116  | 7.69                         | 8.29   | 51.0                        | 49.5   |
| 3               | 0.133                       | 0.0853 | 7.39                         | 6.92   | 50.2                        | 54.8   |
|                 | 0.109                       | 0.130  | 8.34                         | 7.48   | 48.1                        | 48.7   |
|                 | 0.0899                      | 0.136  | 7.35                         | 8.52   | 49.1                        | 46.2   |
| Mean            | 0.121                       | 0.117  | 7.57                         | 7.89   | 50.0                        | 50.1   |
| s.d.            | 0.0174                      | 0.0144 | 0.362                        | 0.588  | 0.899                       | 2.25   |
| Precision, CV%  | 14.4                        | 12.3   | 4.78                         | 7.45   | 1.80                        | 4.49   |
| Accuracy%       | 87.9                        | 88.3   | 94.6                         | 98.7   | 99.8                        | 100    |
| Relative error% | 12.1                        | 11.7   | 5.42                         | 1.33   | 0.194                       | 0.262  |

**Table S6. Intra-day accuracy, precision, and relative error for ND-322 and ND-364 in spiked mouse brain and plasma samples**

| Compound | Brain (n = 5)        |      |                    |      |                     |      | Plasma (n = 5)      |      |                  |      |                 |      |
|----------|----------------------|------|--------------------|------|---------------------|------|---------------------|------|------------------|------|-----------------|------|
|          | Low QC               |      | Medium QC          |      | High QC             |      | Low QC              |      | Medium QC        |      | High QC         |      |
|          | (0.1 pmol/mg tissue) |      | (8 pmol/mg tissue) |      | (50 pmol/mg tissue) |      | (0.1 $\mu$ M)       |      | (8 $\mu$ M)      |      | (50 $\mu$ M)    |      |
|          | mean $\pm$ s.d.      | CV%  | mean $\pm$ s.d.    | CV%  | mean $\pm$ s.d.     | CV%  | mean $\pm$ s.d.     | CV%  | mean $\pm$ s.d.  | CV%  | mean $\pm$ s.d. | CV%  |
| ND-322   | 0.111 $\pm$ 0.0215   | 19.4 | 7.87 $\pm$ 1.43    | 18.2 | 50.1 $\pm$ 0.546    | 1.09 | 0.123 $\pm$ 0.00347 | 2.83 | 7.78 $\pm$ 1.09  | 13.9 | 51.3 $\pm$ 3.03 | 5.91 |
| ND-364   | 0.117 $\pm$ 0.00502  | 4.29 | 8.55 $\pm$ 0.389   | 4.55 | 50.0 $\pm$ 0.710    | 1.42 | 0.119 $\pm$ 0.0222  | 18.8 | 7.79 $\pm$ 0.533 | 6.85 | 51.2 $\pm$ 3.68 | 7.19 |

**Table S7. Extraction efficiency of ND-322 and ND-364 from mouse brain and plasma**

| Compound | Brain Recovery% (n = 3) |      |                    |      |                     |       | Plasma Recovery% (n = 3) |      |                 |      |                 |      |
|----------|-------------------------|------|--------------------|------|---------------------|-------|--------------------------|------|-----------------|------|-----------------|------|
|          | Low QC                  |      | Medium QC          |      | High QC             |       | Low QC                   |      | Medium QC       |      | High QC         |      |
|          | (0.1 pmol/mg tissue)    |      | (8 pmol/mg tissue) |      | (50 pmol/mg tissue) |       | (0.1 $\mu$ M)            |      | (8 $\mu$ M)     |      | (50 $\mu$ M)    |      |
|          | mean $\pm$ s.d.         | CV%  | mean $\pm$ s.d.    | CV%  | mean $\pm$ s.d.     | CV%   | mean $\pm$ s.d.          | CV%  | mean $\pm$ s.d. | CV%  | mean $\pm$ s.d. | CV%  |
| ND-322   | 88.5 $\pm$ 1.92         | 2.18 | 103 $\pm$ 8.24     | 7.99 | 99.3 $\pm$ 1.13     | 1.13  | 97.6 $\pm$ 3.31          | 3.39 | 99.4 $\pm$ 4.22 | 4.25 | 98.4 $\pm$ 1.63 | 1.65 |
| ND-364   | 95.5 $\pm$ 3.69         | 3.87 | 89.0 $\pm$ 2.97    | 3.34 | 99.3 $\pm$ 0.974    | 0.980 | 95.1 $\pm$ 18.7          | 19.6 | 102 $\pm$ 10.4  | 10.2 | 100 $\pm$ 20.5  | 20.4 |
